# Supplementary material
Source: MDPI journal article supplement (https://www.mdpi.com/2075-163X/9/11/689)
Supplement: s1 [file s1]

## Sheet: Table S1
Table 1 U-Pb isotopic ratios and apparent ages of zircons of the biotite tremolite-schist (D0002-1) from the Kongling complex.
Spots	Pb*(ppm)	Th(ppm)	U(ppm)	Th/U	Isotopic ratio							Age (Ma)							Cordance
					207Pb/206Pb	1σ	207Pb/235U	1σ	206Pb/238U	1σ		207Pb/206Pb	1σ	207Pb/235U	1σ	206Pb/238U	1σ
D0002-1-1	268.569	23.96	375.71	0.06	0.21621	0.00452	17.3361	0.21489	0.5814	0.00672		2952.6	33.32	2953.6	11.9	2954.5	27.4		99.9357
D0002-1-2	124.063	29.63	171.58	0.17	0.21346	0.00464	16.9534	0.23701	0.57588	0.00711		2932	34.68	2932.2	13.4	2931.9	29.08		100.003
D0002-1-3	221.228	50.82	408.89	0.12	0.20669	0.00481	12.4315	0.20328	0.43612	0.00581		2879.8	37.31	2637.6	15.37	2333.2	26.06		123.427
D0002-1-4	313.327	30.52	440.28	0.07	0.21462	0.00449	17.1082	0.21349	0.57799	0.0067		2940.8	33.42	2940.9	11.97	2940.6	27.38		100.007
D0002-1-5	209.109	47.03	267.19	0.18	0.22042	0.00463	18.7562	0.23812	0.61701	0.00724		2983.7	33.44	3029.4	12.24	3098	28.86		96.3105
D0002-1-6	354.665	23.73	504.1	0.05	0.21463	0.00445	17.0329	0.20545	0.57542	0.00656		2940.9	33.1	2936.7	11.57	2930	26.83		100.372
D0002-1-7	206.712	110.4	312.03	0.35	0.21448	0.00451	15.2233	0.19163	0.51465	0.00598		2939.7	33.55	2829.3	11.99	2676.4	25.46		109.838
D0002-1-8	193.319	18.14	277.57	0.07	0.21286	0.00603	16.6572	0.40356	0.56743	0.01027		2927.4	45.09	2915.3	23.21	2897.2	42.25		101.042
D0002-1-9	312.621	62.21	439.62	0.14	0.21086	0.0044	16.612	0.20437	0.57123	0.00657		2912.2	33.37	2912.7	11.78	2912.8	26.96		99.9794
D0002-1-10	337.012	78.17	934.45	0.08	0.18419	0.0038	7.58116	0.08899	0.29844	0.00333		2691	33.67	2182.6	10.53	1683.6	16.54		159.836
D0002-1-11	432.006	32.65	614.04	0.05	0.21349	0.00438	16.945	0.19711	0.5755	0.00644		2932.2	32.8	2931.7	11.15	2930.4	26.35		100.061
D0002-1-12	286.315	71.76	392.29	0.18	0.21013	0.00435	16.8904	0.20278	0.58282	0.00662		2906.6	33.15	2928.6	11.51	2960.3	26.97		98.186
D0002-1-13	324.191	70.16	809.89	0.09	0.19438	0.004	8.82733	0.10344	0.32927	0.00368		2779.6	33.37	2320.3	10.69	1834.8	17.84		151.493
D0002-1-14	251.962	18.91	365.09	0.05	0.21084	0.00448	16.4633	0.21471	0.56618	0.00671		2912	33.97	2904.1	12.48	2892.1	27.63		100.688
D0002-1-15	376.075	53.18	530.62	0.1	0.21293	0.00438	16.8813	0.1979	0.57486	0.00646		2927.9	32.88	2928.1	11.24	2927.7	26.42		100.007
D0002-1-16	391.86	33.99	557.26	0.06	0.21314	0.00443	16.8765	0.20515	0.57411	0.00657		2929.6	33.21	2927.8	11.65	2924.7	26.89		100.168
D0002-1-17	185.975	18.98	260.3	0.07	0.21657	0.00452	17.3345	0.21425	0.58035	0.0067		2955.4	33.29	2953.5	11.87	2950.2	27.32		100.176
D0002-1-18	91.9233	141.26	95.18	1.48	0.22974	0.00609	19.0714	0.41752	0.60192	0.01027		3050.2	41.81	3045.4	21.12	3037.6	41.35		100.415
D0002-1-19	343.027	64.54	737.85	0.09	0.20238	0.00426	10.6587	0.13367	0.38187	0.0044		2845.5	33.87	2493.8	11.64	2085	20.51		136.475
D0002-1-20	313.926	26.19	448.06	0.06	0.20976	0.00441	16.6186	0.20965	0.57444	0.00669		2903.7	33.65	2913.1	12.08	2926	27.4		99.2379
D0002-1-21	314.865	37.31	596.23	0.06	0.20567	0.00424	12.3264	0.14497	0.43456	0.00487		2871.7	33.1	2629.6	11.05	2326.3	21.9		123.445
D0002-1-22	236.236	59.72	324.54	0.18	0.21161	0.0045	16.9675	0.2231	0.58139	0.00693		2917.9	34.03	2933	12.61	2954.4	28.24		98.7646
D0002-1-23	173.71	337.43	157.66	2.14	0.22747	0.00478	18.8655	0.2384	0.60134	0.00704		3034.3	33.26	3035	12.19	3035.2	28.34		99.9703
D0002-1-24	187.438	21.85	352.47	0.06	0.19116	0.00408	11.542	0.15168	0.43779	0.00515		2752.1	34.66	2568	12.28	2340.7	23.09		117.576
D0002-1-25	284.156	73.81	394.07	0.19	0.21301	0.00439	16.8805	0.19999	0.5746	0.00648		2928.5	32.97	2928.1	11.36	2926.7	26.54		100.062
D0002-1-26	186.789	67.44	234.93	0.29	0.22281	0.00465	18.9187	0.23352	0.61565	0.00711		3001.1	33.13	3037.7	11.9	3092.6	28.37		97.0413
D0002-1-27	197.243	59.85	266.04	0.22	0.21679	0.00462	17.4179	0.22991	0.58253	0.00696		2957	33.95	2958.1	12.67	2959.1	28.37		99.929
D0002-1-28	270.814	34.35	378.21	0.09	0.21679	0.00458	17.349	0.22299	0.58025	0.00683		2957	33.67	2954.3	12.34	2949.8	27.88		100.244
D0002-1-29	204.524	35.65	342.9	0.1	0.20991	0.00479	14.0108	0.22045	0.48396	0.00634		2904.8	36.51	2750.4	14.91	2544.5	27.54		114.16
D0002-1-30	233.611	34.72	325.56	0.11	0.21778	0.00455	17.3677	0.21501	0.57822	0.00667		2964.3	33.28	2955.4	11.89	2941.5	27.26		100.775
D0002-1-31	173.439	114.24	255.11	0.45	0.21143	0.00509	14.6942	0.26157	0.5039	0.00716		2916.5	38.47	2795.6	16.92	2630.5	30.71		110.872
D0002-1-32	401.129	63.14	571.32	0.11	0.2094	0.00445	16.4492	0.21547	0.56955	0.00676		2900.9	34.05	2903.3	12.54	2906	27.77		99.8245
D0002-1-33	206.581	75.09	279.14	0.27	0.21305	0.00454	16.9513	0.22391	0.57689	0.00689		2928.9	34.05	2932.1	12.66	2936	28.16		99.7582
D0002-1-34	375.747	77.15	674.94	0.11	0.207	0.00429	12.893	0.15462	0.45159	0.00511		2882.2	33.25	2671.9	11.3	2402.3	22.68		119.977
D0002-1-35	327.001	24.51	456.57	0.05	0.21094	0.00439	17.0894	0.20854	0.58739	0.00672		2912.8	33.29	2939.9	11.71	2978.8	27.3		97.7843
D0002-1-36	418.612	149.17	1087.3	0.14	0.1891	0.00397	8.21635	0.102	0.31503	0.00359		2734.4	34.13	2255.1	11.24	1765.4	17.61		154.888
D0002-1-37	249.133	91.79	382.4	0.24	0.21063	0.00477	14.8824	0.23075	0.51229	0.00667		2910.4	36.22	2807.7	14.75	2666.4	28.43		109.151
D0002-1-38	296.541	83.85	405.14	0.21	0.21543	0.00446	17.2192	0.2067	0.57951	0.00658		2946.9	33.03	2947.1	11.52	2946.7	26.84		100.007
D0002-1-39	382.046	33.95	537.19	0.06	0.21075	0.00437	16.9436	0.20545	0.58291	0.00665		2911.3	33.23	2931.6	11.63	2960.6	27.07		98.3348
D0002-1-40	297.652	97.44	415.76	0.23	0.21096	0.00447	16.5904	0.21542	0.57019	0.00673		2912.9	33.91	2911.5	12.43	2908.6	27.65		100.148
D0002-1-41	215.451	17.07	301.49	0.06	0.21811	0.00467	17.523	0.23592	0.58249	0.00704		2966.8	34.14	2963.9	12.93	2958.9	28.66		100.267
D0002-1-42	204.544	62.19	278.46	0.22	0.21581	0.00481	17.2682	0.2592	0.58013	0.00747		2949.7	35.52	2949.9	14.41	2949.3	30.47		100.014
D0002-1-43	189.651	292.08	189.43	1.54	0.22559	0.00481	18.6164	0.24784	0.59832	0.0072		3021	33.83	3022.1	12.83	3023.1	29.03		99.9305
D0002-1-44	223.334	19.86	315.31	0.06	0.21729	0.00451	17.2615	0.20936	0.57596	0.00657		2960.7	33.09	2949.5	11.64	2932.2	26.87		100.972
D0002-1-45	345.736	68.26	458.09	0.15	0.22086	0.00496	18.3828	0.28242	0.60345	0.00791		2987	35.67	3010	14.79	3043.7	31.82		98.1371
D0002-1-46	235.101	36.52	331.31	0.11	0.20501	0.00428	16.3261	0.20154	0.57738	0.00663		2866.5	33.53	2896.1	11.81	2938	27.11		97.5664
D0002-1-47	230.153	59.05	320.01	0.18	0.21243	0.00448	16.8255	0.21542	0.57425	0.00673		2924.2	33.73	2924.9	12.27	2925.3	27.56		99.9624
D0002-1-48	228.113	114.02	306.79	0.37	0.21499	0.00456	17.1059	0.22324	0.57686	0.00684		2943.6	33.87	2940.8	12.52	2935.9	27.95		100.262

## Sheet: Table S2
Table 2 U-Pb isotopic ratios and apparent ages of zircons of the tonalitic geniss (D0002-2) from the Kongling complex.
Grain no.	Pb*(ppm)	Th(ppm)	U(ppm)	Th/U	Isotopic ratio							Age (Ma)							Cordance
D0002-2					207Pb/206Pb	1σ	207Pb/235U	1σ	206Pb/238U	1σ		207Pb/206Pb	1σ	207Pb/235U	1σ	206Pb/238U	1σ
D0002-2-1	71.24	304.34	0.23	71.24	0.20266	0.00442	12.4556	0.16803	0.44539	0.00532		2847.7	35.07	2639.4	12.68	2374.7	23.75		119.918
D0002-2-2	134.54	362.85	0.37	134.54	0.21377	0.00467	16.9711	0.23208	0.57536	0.00698		2934.3	34.87	2933.2	13.11	2929.8	28.58		100.154
D0002-2-3	83.4	251.27	0.33	83.4	0.20213	0.00462	10.5701	0.16008	0.37902	0.00477		2843.4	36.74	2486.1	14.05	2071.7	22.31		137.25
D0002-2-4	99.01	100.17	0.99	99.01	0.22122	0.00503	17.9844	0.27663	0.58925	0.00769		2989.6	36.15	2988.9	14.8	2986.4	31.19		100.107
D0002-2-5	45.73	632.32	0.07	45.73	0.20168	0.00435	12.599	0.16487	0.45282	0.00532		2839.9	34.75	2650.1	12.31	2407.8	23.6		117.946
D0002-2-6	48.09	1151.26	0.04	48.09	0.17267	0.00365	5.23377	0.06391	0.21973	0.00248		2583.6	34.88	1858.1	10.41	1280.4	13.12		201.781
D0002-2-7	139.19	129.94	1.07	139.19	0.22211	0.00527	18.1374	0.30902	0.59202	0.00826		2996	37.63	2997	16.4	2997.6	33.45		99.9466
D0002-2-8	73.4	319.8	0.23	73.4	0.19137	0.00415	8.92462	0.11752	0.33812	0.00394		2753.9	35.19	2330.3	12.02	1877.6	18.98		146.671
D0002-2-9	61.45	1394.04	0.04	61.45	0.13729	0.00314	2.27304	0.03359	0.12004	0.00141		2193.3	39.21	1204	10.42	730.8	8.1		300.123
D0002-2-10	62.86	92.59	0.68	62.86	0.21513	0.005	17.1108	0.2767	0.57669	0.00772		2944.6	37.04	2941.1	15.51	2935.2	31.57		100.32
D0002-2-11	28.51	36.94	0.77	28.51	0.21751	0.00511	18.9593	0.31692	0.63203	0.0087		2962.3	37.37	3039.7	16.12	3157.6	34.38		93.8149
D0002-2-12	53.24	62.82	0.85	53.24	0.2188	0.00532	19.9084	0.36192	0.65978	0.00969		2971.9	38.62	3086.9	17.58	3266.3	37.62		90.9867
D0002-2-13	56.85	49.6	1.15	56.85	0.2167	0.00623	17.3845	0.42837	0.58179	0.01066		2956.3	45.68	2956.3	23.66	2956.1	43.44		100.007
D0002-2-14	166.78	581.28	0.29	166.78	0.20563	0.00429	13.1957	0.15435	0.46539	0.00513		2871.4	33.51	2693.7	11.04	2463.3	22.58		116.567
D0002-2-15	137.38	480.03	0.29	137.38	0.20825	0.00436	17.0396	0.20189	0.59341	0.00659		2892	33.54	2937.1	11.36	3003.2	26.67		96.2973
D0002-2-16	173.94	1122.43	0.15	173.94	0.17636	0.00371	6.20888	0.07442	0.25532	0.00282		2619	34.61	2005.7	10.48	1465.9	14.48		178.662
D0002-2-17	52.81	147.98	0.36	52.81	0.20247	0.00443	11.9637	0.16267	0.42854	0.00506		2846.2	35.23	2601.6	12.74	2299.1	22.83		123.796
D0002-2-18	48.64	1114.59	0.04	48.64	0.15235	0.00335	3.82124	0.05162	0.1819	0.00207		2372.5	37.07	1597.2	10.87	1077.4	11.27		220.206
D0002-2-19	148.53	105.15	1.41	148.53	0.21726	0.00484	17.4208	0.25365	0.58154	0.00725		2960.5	35.51	2958.3	13.98	2955	29.54		100.186
D0002-2-20	93.76	110.01	0.85	93.76	0.21602	0.00503	17.2857	0.28212	0.58034	0.00779		2951.3	37.1	2950.8	15.67	2950.1	31.76		100.041
D0002-2-21	164.07	106.66	1.54	164.07	0.21552	0.005	17.2201	0.27903	0.57949	0.00773		2947.5	37	2947.2	15.55	2946.7	31.56		100.027
D0002-2-22	91.43	408.62	0.22	91.43	0.20822	0.00434	17.0267	0.19973	0.59306	0.00652		2891.7	33.44	2936.3	11.25	3001.8	26.37		96.3322
D0002-2-23	58.32	64.51	0.9	58.32	0.21608	0.00524	17.3144	0.3102	0.58115	0.00831		2951.7	38.58	2952.4	17.2	2953.4	33.89		99.9424
D0002-2-24	109.25	749.04	0.15	109.25	0.19974	0.00414	9.8436	0.11264	0.35741	0.00386		2824.1	33.47	2420.2	10.55	1969.9	18.31		143.363
D0002-2-25	78.1	110.4	0.71	78.1	0.21471	0.0047	17.2082	0.23821	0.58121	0.00699		2941.4	34.93	2946.5	13.28	2953.7	28.48		99.5836
D0002-2-26	66.19	292.1	0.23	66.19	0.22759	0.00477	18.8706	0.22583	0.60128	0.00666		3035.2	33.18	3035.2	11.54	3035	26.81		100.007
D0002-2-27	58.03	101.61	0.57	58.03	0.21038	0.0047	16.994	0.24982	0.58577	0.00729		2908.5	35.75	2934.5	14.1	2972.2	29.64		97.8568
D0002-2-28	265.37	652.99	0.41	265.37	0.20551	0.00426	14.5495	0.16672	0.51339	0.00552		2870.5	33.3	2786.2	10.89	2671.1	23.53		107.465
D0002-2-29	232.5	482.11	0.48	232.5	0.20967	0.00434	14.3578	0.16336	0.49656	0.00532		2903	33.14	2773.6	10.8	2599	22.91		111.697
D0002-2-30	259.45	486.23	0.53	259.45	0.20335	0.00425	11.7529	0.13862	0.41909	0.00455		2853.2	33.64	2584.9	11.04	2256.4	20.67		126.449

## Sheet: Table S3
Table 3 U-Pb isotopic ratios and apparent ages of zircons of the trondjemitic gneiss (D0002-3) from the Kongling complex.
Grain no.	Pb*(ppm)	Th(ppm)	U(ppm)	Th/U	Isotopic ratio							Age (Ma)							Cordance
D0002-3					207Pb/206Pb	1σ	207Pb/235U	1σ	206Pb/238U	1σ		207Pb/206Pb	1σ	207Pb/235U	1σ	206Pb/238U	1σ
D0002-3-1	107.612	147.14	125.01	1.18	0.22156	0.00479	16.3961	0.21174	0.53656	0.00615		2992.1	34.33	2900.2	12.36	2769	25.81		108.057
D0002-3-2	149.685	180.48	164.34	1.1	0.21542	0.00462	17.2095	0.21831	0.57922	0.00658		2946.8	34.25	2946.6	12.17	2945.6	26.85		100.041
D0002-3-3	39.5421	30.61	48.42	0.63	0.22414	0.00519	17.069	0.27051	0.55215	0.00722		3010.7	36.71	2938.7	15.2	2834.1	29.99		106.231
D0002-3-4	158.316	116.63	197.87	0.59	0.22426	0.00488	17.1975	0.22794	0.556	0.00649		3011.5	34.51	2945.9	12.72	2850.1	26.89		105.663
D0002-3-5	200.395	65.32	347.35	0.19	0.20488	0.00436	12.3474	0.151	0.43695	0.00482		2865.5	34.23	2631.2	11.49	2337	21.62		122.614
D0002-3-6	90.9134	68.36	111.42	0.61	0.21259	0.00491	16.9506	0.26774	0.57812	0.00752		2925.4	36.89	2932	15.14	2941.1	30.73		99.4662
D0002-3-7	18.3422	11.71	21.64	0.54	0.20915	0.00553	16.9675	0.35967	0.5882	0.00945		2899	42.23	2933	20.33	2982.1	38.36		97.2134
D0002-3-8	23.0813	19.27	27.57	0.7	0.21254	0.00541	16.8147	0.3304	0.5736	0.00871		2925	40.58	2924.3	18.83	2922.6	35.67		100.082
D0002-3-9	63.9984	53.38	75.84	0.7	0.21437	0.00498	17.0499	0.27361	0.57666	0.00759		2938.9	37.06	2937.6	15.39	2935.1	31.04		100.129
D0002-3-10	193.225	92.25	400.24	0.23	0.19449	0.00408	9.64752	0.11159	0.35966	0.00385		2780.5	33.97	2401.7	10.64	1980.6	18.25		140.387
D0002-3-11	133.698	77.39	164.95	0.47	0.21654	0.00459	17.3246	0.21086	0.5801	0.00644		2955.1	33.8	2953	11.68	2949.1	26.28		100.203
D0002-3-12	138.117	248.24	132.74	1.87	0.2157	0.00469	17.205	0.22897	0.57831	0.00676		2948.9	34.69	2946.3	12.77	2941.9	27.61		100.238
D0002-3-13	150.216	104.9	181.83	0.58	0.21505	0.00454	17.154	0.20571	0.57835	0.00637		2944	33.68	2943.5	11.51	2942	26.01		100.068
D0002-3-14	130.841	193.24	133.47	1.45	0.221	0.00519	17.9236	0.29706	0.58804	0.00797		2988	37.3	2985.6	15.94	2981.5	32.34		100.218
D0002-3-15	47.1468	44.18	55.08	0.8	0.21313	0.00629	16.9195	0.43424	0.57558	0.01087		2929.5	46.94	2930.3	24.61	2930.7	44.48		99.9591
D0002-3-16	95.6075	38.53	122.29	0.32	0.2138	0.00467	17.0008	0.23031	0.57653	0.00681		2934.6	34.9	2934.9	12.99	2934.6	27.84		100
D0002-3-17	41.2612	25.06	51.19	0.49	0.21313	0.00694	16.8466	0.50167	0.57312	0.0123		2929.5	51.7	2926.1	28.54	2920.6	50.39		100.305
D0002-3-18	108.157	102.81	122.34	0.84	0.22268	0.00556	18.1249	0.34588	0.59015	0.00888		3000.2	39.59	2996.4	18.36	2990	36.02		100.341
D0002-3-19	199.954	87.35	264.36	0.33	0.21197	0.00447	16.7418	0.20083	0.57267	0.0063		2920.6	33.72	2920.2	11.49	2918.8	25.84		100.062
D0002-3-20	18.0114	14.45	20.5	0.7	0.22389	0.00853	18.2915	0.68037	0.59235	0.01584		3008.9	59.93	3005.2	35.81	2998.9	64.12		100.333
D0002-3-21	225.48	79.44	962.35	0.08	0.15038	0.0032	3.96276	0.04775	0.19106	0.00205		2350.3	35.88	1626.6	9.77	1127.1	11.08		208.526
D0002-3-22	72.5896	65.85	85.34	0.77	0.2104	0.00492	16.9056	0.27718	0.58257	0.00778		2908.6	37.4	2929.5	15.72	2959.2	31.68		98.2901
D0002-3-23	111.388	77.44	132.84	0.58	0.21523	0.00456	17.1928	0.21008	0.57918	0.00645		2945.3	33.79	2945.7	11.73	2945.4	26.31		99.9966
D0002-3-24	29.5368	27.61	32.98	0.84	0.22047	0.00521	17.9008	0.30206	0.58871	0.00807		2984.1	37.55	2984.4	16.23	2984.2	32.74		99.9966
D0002-3-25	277.928	140.36	572.87	0.25	0.19976	0.00418	10.4164	0.12048	0.37808	0.00405		2824.3	33.72	2472.5	10.72	2067.3	18.96		136.618
D0002-3-26	51.4974	51.46	71.06	0.72	0.21874	0.00515	14.589	0.2403	0.48358	0.00642		2971.4	37.47	2788.8	15.65	2542.8	27.9		116.855
D0002-3-27	58.7058	51.81	68.58	0.76	0.21437	0.00473	17.0687	0.23956	0.5773	0.00697		2938.9	35.22	2938.7	13.46	2937.7	28.47		100.041
D0002-3-28	132.989	68.51	165.71	0.41	0.2147	0.00454	17.106	0.20837	0.57769	0.00642		2941.4	33.74	2940.8	11.69	2939.3	26.22		100.071
D0002-3-29	303.352	630.74	528.76	1.19	0.20239	0.00424	11.2308	0.13153	0.40234	0.00434		2845.6	33.74	2542.5	10.92	2179.8	19.97		130.544
D0002-3-30	93.8281	120.29	251.92	0.48	0.18497	0.00403	7.01708	0.09166	0.27507	0.00308		2697.9	35.51	2113.6	11.61	1566.5	15.57		172.225

## Sheet: Table S4
Table 4 U-Pb isotopic ratios and apparent ages of zircons of the granite dikes (D0002-4).
Grain no.	Pb*(ppm)	Th(ppm)	U(ppm)	Th/U	Isotopic ratio							Age (Ma)							Cordance
D0002-4					207Pb/207Pb	1σ	207Pb/235U	1σ	206Pb/238U	1σ		207Pb/207Pb	1σ	207Pb/235U	1σ	206Pb/238U	1σ
D0002-4-1	452.644	269.44	586.96	0.46	0.21772	0.00459	16.92	0.19602	0.56357	0.0061		2963.9	33.57	2930.3	11.11	2881.4	25.14		102.863
D0002-4-2	378.074	292.3	468.86	0.62	0.21294	0.00446	16.8924	0.19203	0.57526	0.00617		2928.1	33.5	2928.7	10.9	2929.4	25.23		99.9556
D0002-4-3	252.129	199.68	1550.91	0.13	0.15489	0.00342	2.82098	0.03719	0.13207	0.00146		2400.6	37.1	1361.1	9.88	799.7	8.31		300.188
D0002-4-4	277.35	68.82	505.76	0.14	0.20683	0.00434	12.315	0.14066	0.43178	0.00463		2880.9	33.67	2628.7	10.73	2313.7	20.85		124.515
D0002-4-5	239.306	191.52	294.3	0.65	0.21365	0.00459	16.9629	0.21288	0.57575	0.00651		2933.4	34.3	2932.7	12.03	2931.4	26.65		100.068
D0002-4-6	215.102	119.16	276.25	0.43	0.2167	0.00466	17.1747	0.21718	0.57474	0.00654		2956.3	34.29	2944.6	12.13	2927.2	26.76		100.994
D0002-4-7	311.491	61.3	437.46	0.14	0.20576	0.00441	15.9241	0.19877	0.56121	0.00632		2872.4	34.39	2872.3	11.93	2871.6	26.11		100.028
D0002-4-8	283.46	237.11	518.31	0.46	0.21169	0.00448	11.7922	0.13987	0.40395	0.00442		2918.5	33.82	2588	11.1	2187.2	20.27		133.435
D0002-4-9	172.373	198.56	1530	0.13	0.13223	0.00282	1.57259	0.019	0.08624	0.00093		2127.8	36.91	959.4	7.5	533.3	5.5		398.987
D0002-4-10	377.057	192.79	488.48	0.39	0.21609	0.00465	17.1668	0.2191	0.57607	0.0066		2951.8	34.3	2944.2	12.25	2932.7	26.99		100.651
D0002-4-11	356.846	140.21	957.06	0.15	0.18997	0.00397	7.55915	0.08625	0.28854	0.00309		2741.9	33.96	2180	10.23	1634.2	15.46		167.782
D0002-4-12	409.962	225.81	700.13	0.32	0.20829	0.00433	12.743	0.14339	0.44363	0.00474		2892.3	33.33	2660.8	10.59	2366.9	21.18		122.198
D0002-4-13	283.273	168.77	372.12	0.45	0.20674	0.00463	16.0549	0.23392	0.56312	0.00696		2880.2	35.92	2880.1	13.93	2879.5	28.71		100.024
D0002-4-14	287.632	142.04	476.37	0.3	0.20161	0.00433	13.1839	0.16751	0.47418	0.00538		2839.3	34.55	2692.9	11.99	2501.9	23.54		113.486
D0002-4-15	229.146	199.7	1384.15	0.14	0.1534	0.00324	2.69507	0.032	0.12739	0.00137		2384.2	35.53	1327.1	8.79	773	7.85		308.435
D0002-4-16	286.636	162.7	368.78	0.44	0.21473	0.00448	17.1004	0.19814	0.57748	0.0063		2941.6	33.28	2940.5	11.11	2938.5	25.73		100.105
D0002-4-17	164.605	73.23	214.07	0.34	0.21378	0.00488	16.9847	0.2624	0.57611	0.00744		2934.4	36.41	2934	14.81	2932.9	30.41		100.051
D0002-4-18	289.34	92.12	384.4	0.24	0.21399	0.00445	17.0113	0.19709	0.57646	0.00629		2936	33.25	2935.5	11.11	2934.3	25.72		100.058
D0002-4-19	507.488	549.26	588.41	0.93	0.21659	0.00451	17.2015	0.19979	0.57589	0.0063		2955.5	33.18	2946.1	11.15	2932	25.76		100.802
D0002-4-20	500.189	312.08	633.03	0.49	0.2072	0.00428	16.0872	0.18214	0.56301	0.00607		2883.7	33.16	2882	10.82	2879.1	25.05		100.16
D0002-4-21	446.486	272.93	669.57	0.41	0.21259	0.00438	14.4654	0.16228	0.49342	0.0053		2925.4	32.96	2780.7	10.65	2585.4	22.87		113.151
D0002-4-22	201.279	78.91	264.04	0.3	0.21624	0.00448	17.201	0.19863	0.57682	0.0063		2952.9	33.08	2946.1	11.08	2935.7	25.74		100.586
D0002-4-23	399.306	201.86	509.82	0.4	0.21389	0.00444	17.0183	0.19758	0.57697	0.00632		2935.2	33.16	2935.9	11.13	2936.4	25.82		99.9591
D0002-4-24	430.693	394.84	969.34	0.41	0.19797	0.0041	9.16837	0.10519	0.33583	0.00363		2809.5	33.48	2355	10.5	1866.6	17.53		150.514
D0002-4-25	353.708	183.19	465.75	0.39	0.20767	0.00436	16.2071	0.19865	0.56594	0.00638		2887.4	33.7	2889.1	11.72	2891.1	26.25		99.872
D0002-4-26	360.455	118.91	624.71	0.19	0.19502	0.00401	11.9861	0.13577	0.44569	0.00481		2784.9	33.31	2603.3	10.62	2376.1	21.46		117.205
D0002-4-27	235.275	101.81	387.86	0.26	0.19727	0.00427	12.6101	0.16851	0.46354	0.00542		2803.8	34.93	2651	12.57	2455.2	23.88		114.198
D0002-4-28	403.549	180.05	905.1	0.2	0.18702	0.00385	9.01205	0.10275	0.34943	0.00378		2716.2	33.57	2339.2	10.42	1931.9	18.04		140.597
D0002-4-29	285.798	36.32	433.39	0.08	0.20221	0.00416	14.7102	0.1684	0.52753	0.00574		2844.2	33.15	2796.7	10.88	2731	24.23		104.145
D0002-4-30	480.98	1336.66	743.74	1.8	0.19759	0.00404	12.8296	0.14272	0.47084	0.00505		2806.4	33.01	2667.2	10.48	2487.3	22.15		112.829
D0002-4-31	279.864	60.53	385.19	0.16	0.20755	0.00431	16.1478	0.19164	0.56419	0.00627		2886.5	33.28	2885.6	11.35	2883.9	25.82		100.09
D0002-4-32	461.354	495.88	794.85	0.62	0.20797	0.00426	12.0895	0.13679	0.42155	0.00456		2889.8	32.87	2611.4	10.61	2267.5	20.69		127.444
D0002-4-33	454.784	299.99	665.25	0.45	0.21142	0.00432	14.7282	0.16505	0.5052	0.00545		2916.4	32.67	2797.8	10.66	2636.1	23.36		110.633
D0002-4-34	133.247	124.22	153.68	0.81	0.21896	0.00497	17.6743	0.27795	0.58537	0.00773		2973.1	36.14	2972.2	15.11	2970.6	31.42		100.084
D0002-4-35	604.816	208.02	1032.7	0.2	0.19563	0.00403	12.3562	0.14363	0.45805	0.00502		2790.1	33.34	2631.9	10.92	2430.9	22.19		114.776
D0002-4-36	377.289	69.06	611.44	0.11	0.19858	0.00404	13.4039	0.14965	0.4895	0.00528		2814.6	32.88	2708.5	10.55	2568.5	22.83		109.581

## Sheet: Table S5
Table 5 U-Pb isotopic ratios and apparent ages of zircons of the granite dikes (D0002-5).
Grain no.	Pb*(ppm)	Th(ppm)	U(ppm)	Th/U	Isotopic ratio							Age (Ma)							Cordance
D0002-5					207Pb/207Pb	1σ	207Pb/235U	1σ	206Pb/238U	1σ		207Pb/207Pb	1σ	207Pb/235U	1σ	206Pb/238U	1σ
D0002-5-1	307.708	42.7	596.95	0.07	0.20063	0.00415	11.3111	0.13013	0.40882	0.00444		2831.3	33.31	2549.1	10.73	2209.5	20.3		128.142
D0002-5-2	176.791	30.18	269.84	0.11	0.2034	0.00423	14.4636	0.17181	0.51563	0.0057		2853.7	33.5	2780.6	11.28	2680.6	24.24		106.458
D0002-5-3	242.044	89.79	551.5	0.16	0.19427	0.00409	9.05285	0.11038	0.33791	0.00375		2778.7	34.09	2343.4	11.15	1876.6	18.05		148.071
D0002-5-4	364.183	36.97	773.38	0.05	0.19627	0.00403	10.2277	0.11497	0.37787	0.00406		2795.4	33.21	2455.6	10.4	2066.3	18.98		135.285
D0002-5-5	327.094	102.62	435.82	0.24	0.2104	0.00436	16.5184	0.19383	0.56931	0.00627		2908.6	33.2	2907.3	11.23	2905	25.76		100.124
D0002-5-6	284.404	87.65	388.07	0.23	0.20629	0.00431	15.9976	0.19323	0.56232	0.00628		2876.7	33.56	2876.7	11.54	2876.2	25.92		100.017
D0002-5-7	353.444	67.18	855.57	0.08	0.20111	0.00414	9.0383	0.10254	0.32589	0.00351		2835.2	33.19	2341.9	10.37	1818.5	17.07		155.909
D0002-5-8	219.472	46.91	381.02	0.12	0.2018	0.00419	12.5186	0.14697	0.44983	0.00493		2840.8	33.45	2644.1	11.04	2394.5	21.94		118.639
D0002-5-9	105.862	70.16	136.47	0.51	0.20403	0.0043	15.6858	0.19438	0.55749	0.00631		2858.7	33.86	2857.9	11.83	2856.2	26.11		100.088
D0002-5-10	290.264	67.75	456.12	0.15	0.20386	0.00419	13.8786	0.15654	0.49366	0.00532		2857.4	33.03	2741.5	10.68	2586.5	22.97		110.474
D0002-5-11	299.394	69.41	454.87	0.15	0.20828	0.00428	14.7986	0.16822	0.51521	0.00558		2892.2	32.99	2802.4	10.81	2678.8	23.74		107.966
D0002-5-12	258.994	38.76	363.26	0.11	0.20765	0.00437	16.1454	0.19925	0.56382	0.00637		2887.3	33.73	2885.4	11.8	2882.4	26.27		100.17
D0002-5-13	329.344	53.01	587.4	0.09	0.20254	0.00421	12.4379	0.14718	0.4453	0.0049		2846.8	33.5	2638	11.12	2374.3	21.87		119.901
D0002-5-14	314.957	28.65	515.92	0.06	0.2098	0.00438	14.0397	0.16881	0.48526	0.0054		2904	33.46	2752.4	11.4	2550.1	23.42		113.878
D0002-5-15	369.541	38.67	516.14	0.07	0.21184	0.00444	16.6422	0.20378	0.56965	0.00642		2919.7	33.54	2914.4	11.73	2906.4	26.35		100.458
D0002-5-16	321.497	120.49	696.5	0.17	0.19873	0.00408	10.0223	0.11314	0.36569	0.00394		2815.8	33.17	2436.8	10.42	2009.1	18.58		140.152
D0002-5-17	369.05	43.47	676.32	0.06	0.20105	0.00416	12.1887	0.14111	0.43961	0.00479		2834.8	33.32	2619	10.86	2348.9	21.45		120.686
D0002-5-18	306.536	80.08	626.93	0.13	0.19954	0.00413	10.816	0.1257	0.39306	0.00428		2822.4	33.41	2507.4	10.8	2137	19.82		132.073
D0002-5-19	304.8	35.32	433.02	0.08	0.20658	0.00426	16.0181	0.18457	0.56227	0.00613		2878.9	33.11	2877.9	11.01	2876	25.29		100.101
D0002-5-20	402.296	34.15	565.47	0.06	0.21002	0.00431	16.5147	0.18715	0.57021	0.00617		2905.7	32.88	2907.1	10.85	2908.7	25.32		99.8969
D0002-5-21	394.932	361.68	1360.63	0.27	0.19387	0.00406	5.62481	0.06718	0.21038	0.0023		2775.3	33.91	1919.9	10.3	1230.8	12.26		225.487
D0002-5-22	171.468	20.47	241.75	0.08	0.20519	0.00429	15.9855	0.19359	0.56491	0.00631		2868	33.58	2875.9	11.57	2886.9	26		99.3453
D0002-5-23	243.935	48.12	394.78	0.12	0.21002	0.00435	14.1141	0.1652	0.48731	0.00534		2905.7	33.18	2757.4	11.1	2559	23.16		113.548
D0002-5-24	328.841	52.83	630.54	0.08	0.20634	0.00426	11.8375	0.1366	0.416	0.00452		2877	33.15	2591.6	10.8	2242.3	20.59		128.306

## Sheet: Table S6
Table 2 Results of the major and trace element analyses of samples from Shuiyuesi area.
Sample	D0002-1	D0002-2	SMK-4	D0002-3	SMK-1	D0002-4	D0002-5
	Biotite tremolite-schist	Tonalitic gneiss		Trondhjemite gneiss		Granite dike
SiO2	54.71	76.8	70.86	76.08	69.79	73.92	78.74
TiO2	0.236	0.09	0.29	0.158	0.43	0.183	0.03
Al2O3	2.78	13.77	15.82	14.08	15.49	13.11	12.85
FeOtotal	6.65	0.55	2.05	0.57	2.19	1.12	0.24
MnO	0.241	0.006	0.03	0.008	0.03	0.016	0.005
MgO	20.81	0.288	0.81	0.3	1.02	0.278	0.163
CaO	10.28	0.913	2.82	0.754	2.48	1.21	0.854
Na2O	0.114	5.98	4.98	6.67	4.55	4.41	5.98
K2O	1.46	0.875	1.53	0.704	2.62	4.28	0.521
P2O5	0.0076	0.018	0.06	0.05	0.12	0.08	0.015
LOI	1.53	0.486	0.37	0.468	0.71	0.983	0.469
Total	98.82	99.78	99.62	99.84	99.43	99.59	99.87
Mg#	85	47	41	47	45	30	55
K2O+Na2O	1.57	6.86	6.51	7.37	7.17	8.69	6.5
K2O/Na2O	12.8	0.15	0.31	0.11	0.58	0.97	0.09
A/CNK	0.136	1.106	1.057	1.074	1.045	0.931	1.075
V	56.4	7.68	19.66	8.38	43.64	18.4	4.1
Cr	1800	3.39	9.48	1.7	12.32	6.66	1.52
Co	106	1.52	55.49	1.33	61.78	2.13	＜1
Ni	1630	2.87	7.17	3.14	8.41	4.88	3.29
Ga	7.5	33.6	15.24	20.8	53.29	63.6	24.5
Rb	94.7	23.4	75.44	26.3	56.78	76.5	16.5
Sr	20.5	311	370.39	196	437.36	243	342
Y	5.9	7.89	6.27	4.82	9.28	10.6	12.2
Zr	29.8	66.1	102.94	91.6	248.84	215	61.7
Nb	1.26	3.1	6.66	3.01	6.1	2.8	2.74
Ba	121	947	186.83	312	1590.08	2540	306
La	1.19	28.6	18.5	14.8	24.32	148	15.8
Ce	3.05	39.7	29.38	19.6	39.93	195	20.4
Pr	0.62	5.53	3.33	2.76	5.05	18.1	2.98
Nd	3.07	20	11.18	10	18.31	60.4	11.6
Sm	0.88	3.47	1.65	1.76	3.12	8.37	2.55
Eu	0.24	1.05	0.74	0.8	1.49	1.69	0.7
Gd	0.86	2.79	1.42	1.55	2.74	6.67	2.29
Tb	0.16	0.34	0.2	0.22	0.35	0.66	0.38
Dy	1.1	1.6	1.13	1.08	1.81	2.46	2.28
Ho	0.24	0.29	0.23	0.19	0.34	0.41	0.46
Er	0.64	0.76	0.73	0.46	0.97	1.04	1.24
Tm	0.1	1.11	0.12	0.062	0.14	0.11	0.2
Yb	0.71	0.74	0.87	0.36	0.92	0.68	1.29
Lu	0.1	0.1	0.14	0.044	0.14	0.086	0.18
Hf	0.98	2.99	3.21	2.88	6.29	5.29	4.45
Ta	0.099	0.41	0.56	0.088	0.54	0.097	0.43
Pb	3.38	8.71	19.4	5.88	19.27	12.4	10.8
Th	0.19	12.5	4.95	1.63	7.26	11.5	13.6
U	0.42	1.6	0.41	0.36	1	0.49	5.49
LaN/YbN	1.2	27.72	15.3	29.49	18.88	156.12	8.79
Eu/Eu*	0.83	1	1.42	1.45	1.52	0.67	0.87
1000 Ga/Al	5.4	4.88	0.36	2.95	0.32	9.7	3.81
LREE	9.05	98.35	64.78	49.72	92.23	431.56	54.03
HREE	3.91	6.73	4.84	3.97	7.42	12.12	8.32
Total REE	12.96	105.08	69.62	53.69	99.65	443.68	62.35

## Sheet: Table S7
Table 7 LA-MC-ICPMS zircon Lu–Hf isotope data for the samples from Shuiyuesi area.
Sample	176Hf/177Hf	1σ	176Lu/177Hf	1σ	176Yb/177Hf	1σ	Age (Ma)	176Hf/177Hf (t)	εHf(t)	1σ	TDM1	TDM2	fLu/Hf
D0002-1-01	0.280951	2.23252e-05	0.000407435	1.5254e-06	0.00817651	3.11995e-05	2953	0.280927	1.32456	1.07344	3.14751	3.22861	-0.987728
D0002-1-02	0.280855	1.44551e-05	0.000403842	3.1078e-06	0.00861129	3.85485e-05	2941	0.280833	-2.40082	0.886193	3.27338	3.41201	-0.987836
D0002-1-03	0.280835	1.20329e-05	0.000486085	3.76879e-06	0.0108756	0.000113252	2932	0.280808	-3.49811	0.838471	3.30734	3.46274	-0.985359
D0002-1-04	0.28089	1.80736e-05	0.000326874	1.74388e-06	0.0066778	2.40047e-05	2912	0.280872	-1.68807	0.964134	3.22134	3.35125	-0.990154
D0002-1-05	0.280916	2.39083e-05	0.000474377	3.39972e-06	0.0103315	8.04734e-05	2930	0.28089	-0.631924	1.11764	3.19851	3.30979	-0.985712
D0002-1-06	0.280917	1.77272e-05	0.000383549	5.39027e-06	0.00826069	5.02143e-05	2955	0.280895	0.143552	0.963285	3.19041	3.28877	-0.988447
D0002-1-07	0.280838	1.03981e-05	0.000536047	3.29849e-06	0.0120147	0.000111732	2846	0.280809	-5.46893	0.803593	3.30797	3.49838	-0.983854
D0002-1-08	0.280786	1.22532e-05	0.000259671	3.61107e-06	0.00586314	9.29465e-05	2918	0.280771	-5.13108	0.841429	3.35368	3.53773	-0.992179
D0002-1-09	0.280869	1.06221e-05	0.00147274	6.37779e-05	0.0487955	0.00251756	3034	0.280784	-1.98447	0.885682	3.34633	3.46418	-0.95564
D0002-1-10	0.280926	1.80706e-05	0.000423498	5.61301e-06	0.0105189	8.66245e-05	3001	0.280902	1.45586	0.974467	3.18118	3.25619	-0.987244
D0002-1-11	0.280961	1.53275e-05	0.000398653	4.29577e-06	0.0096907	0.000113209	2957	0.280939	1.74423	0.907441	3.13248	3.2057	-0.987992
D0002-1-12	0.280875	1.23912e-05	0.00072116	1.87297e-06	0.0179452	4.83156e-05	2901	0.280834	-3.26942	0.841248	3.27459	3.426	-0.978278
D0002-1-13	0.280877	1.16848e-05	0.000846514	6.12648e-06	0.0200275	0.000231129	2913	0.28083	-3.16289	0.833308	3.28207	3.42993	-0.974503
D0002-1-14	0.280822	1.63015e-05	0.000556171	2.93487e-06	0.0137833	9.04956e-05	2947	0.28079	-3.76683	0.926403	3.33091	3.48885	-0.983248
D0002-1-15	0.280831	1.15796e-05	0.000460098	2.79718e-06	0.0103608	0.000129434	2967	0.280804	-2.79951	0.831483	3.311	3.45376	-0.986142
D0002-1-16	0.280883	1.33206e-05	0.00148961	3.9962e-05	0.0520021	0.00167724	3021	0.280797	-1.81057	0.912415	3.32872	3.44465	-0.955132
D0002-2-01	0.280847	9.60939e-06	0.000732888	1.54328e-06	0.0223617	7.01022e-05	2934	0.280806	-3.51709	0.795217	3.31222	3.46533	-0.977925
D0002-2-02	0.280872	1.251e-05	0.00101025	9.75236e-06	0.0292411	0.000147761	2945	0.280815	-2.95085	0.854765	3.30298	3.44422	-0.969571
D0002-2-03	0.280859	1.47727e-05	0.00151985	3.06175e-05	0.0455114	0.00094155	2956	0.280772	-4.19431	0.927846	3.36494	3.51853	-0.954221
D0002-2-04	0.280853	1.18553e-05	0.00101466	1.74629e-05	0.0305184	0.000620302	2958	0.280796	-3.32266	0.851408	3.32819	3.47418	-0.969438
D0002-2-05	0.280844	1.11628e-05	0.000784413	3.59067e-05	0.0228831	0.00117764	2951	0.2808	-3.33456	0.857736	3.3204	3.46924	-0.976373
D0002-2-06	0.28087	1.3643e-05	0.00188215	4.44853e-05	0.0570245	0.00149669	2948	0.280763	-4.70806	0.919522	3.38206	3.53924	-0.943309
D0002-2-07	0.280841	1.45783e-05	0.00104601	1.66565e-05	0.0304542	0.000321221	2952	0.280782	-3.96066	0.905758	3.34752	3.50304	-0.968494
D0002-2-08	0.280868	1.20996e-05	0.00151849	3.0716e-05	0.0464083	0.00101264	2941	0.280783	-4.18049	0.869709	3.35163	3.50588	-0.954262
D0002-3-01	0.280909	1.49538e-05	0.00141787	2.3838e-05	0.0435375	0.000697923	2992	0.280828	-1.38729	0.925853	3.28719	3.39918	-0.957293
D0002-3-02	0.280843	1.28891e-05	0.00118362	1.39966e-05	0.0345204	0.0004236	2925	0.280776	-4.78285	0.865529	3.35719	3.52492	-0.964349
D0002-3-05	0.280889	1.48904e-05	0.0018816	1.44343e-05	0.0583484	0.000387317	2988	0.280781	-3.1594	0.912159	3.35614	3.48945	-0.943325
D0002-3-06	0.280793	8.66736e-06	0.000684222	1.63134e-05	0.0202831	0.000417135	3009	0.280754	-3.62414	0.798778	3.37985	3.53066	-0.979391
D0002-3-07	0.28087	1.30041e-05	0.00142349	1.48324e-05	0.0425496	0.000518264	2945	0.28079	-3.83314	0.870153	3.34071	3.49075	-0.957124
D0002-3-08	0.280844	1.33494e-05	0.000642343	1.22553e-05	0.0190831	0.00045143	2984	0.280807	-2.31211	0.876807	3.30895	3.44159	-0.980652
D0002-3-09	0.280867	1.47846e-05	0.00147316	5.60246e-06	0.0437417	0.000367812	2939	0.280784	-4.18985	0.895911	3.34978	3.50478	-0.955628
D0002-4-01	0.2809	1.2741e-05	0.00164551	4.53402e-05	0.0508708	0.00170702	2964	0.280807	-2.79508	0.902165	3.31933	3.45113	-0.950436
D0002-4-02	0.280856	1.08385e-05	0.000579059	6.38018e-06	0.0175946	0.000264475	2872	0.280824	-4.3097	0.815733	3.28733	3.45785	-0.982558
D0002-4-03	0.280913	1.60889e-05	0.00122549	1.88505e-05	0.0401551	0.000433675	2933	0.280844	-2.17242	0.941275	3.26518	3.39357	-0.963088
D0002-4-04	0.280813	1.20076e-05	0.00109946	2.04674e-05	0.0298842	0.000733371	2952	0.280751	-5.0553	0.857122	3.38955	3.56072	-0.966884
D0002-4-05	0.28091	1.08812e-05	0.0016671	3.34975e-05	0.0499408	0.00119543	2880	0.280818	-4.34351	0.844374	3.30769	3.46598	-0.949786
D0002-4-06	0.280897	1.23665e-05	0.00100572	1.2764e-05	0.0312093	0.000357612	2942	0.28084	-2.10822	0.855136	3.26849	3.39736	-0.969707
D0002-4-07	0.28088	1.06732e-05	0.000941962	3.94283e-06	0.0288	0.000249426	2934	0.280827	-2.78337	0.814697	3.28661	3.42662	-0.971628
D0002-4-08	0.280874	1.16089e-05	0.00106206	1.08129e-05	0.032768	0.000243594	2936	0.280814	-3.18141	0.838243	3.30453	3.44922	-0.96801
D0002-4-09	0.28083	1.51838e-05	0.00123729	2.11108e-05	0.0373967	0.000921305	2956	0.28076	-4.62986	0.924934	3.3784	3.54149	-0.962732
D0002-4-10	0.280907	1.06007e-05	0.00197265	1.33611e-05	0.0656968	0.000407373	2884	0.280798	-4.94985	0.819067	3.3382	3.50114	-0.940583
D0002-4-11	0.280879	1.24687e-05	0.00132353	9.18507e-06	0.0418792	9.58803e-05	2953	0.280804	-3.13971	0.85385	3.32002	3.46055	-0.960135
D0002-4-12	0.280941	1.21138e-05	0.00211428	0.000106601	0.070993	0.00403581	2935	0.280822	-2.91407	0.964059	3.30391	3.43431	-0.936317
D0002-4-13	0.280908	1.23305e-05	0.00169552	2.93916e-05	0.0511724	0.00105183	2887	0.280814	-4.30586	0.869007	3.31252	3.46956	-0.94893
D0002-4-14	0.280879	8.83783e-06	0.00119259	2.12676e-05	0.034871	0.000890327	2887	0.280813	-4.3665	0.797125	3.3091	3.47276	-0.964079
D0002-5-01	0.28092	2.01109e-05	0.00139657	1.52554e-05	0.0381929	0.000433589	2909	0.280842	-2.8091	1.03322	3.2706	3.40807	-0.957935
D0002-5-02	0.280888	1.02864e-05	0.00105412	1.63173e-05	0.0302834	0.000378007	2877	0.28083	-3.9908	0.816014	3.28477	3.44499	-0.968249
D0002-5-03	0.280845	1.29965e-05	0.000937307	1.96613e-05	0.0285523	0.000583594	2859	0.280793	-5.70516	0.869637	3.3329	3.52115	-0.971768
D0002-5-04	0.2809	2.37675e-05	0.00124978	7.55555e-06	0.0340756	0.000142037	2887	0.28083	-3.73615	1.11783	3.28574	3.4395	-0.962356
D0002-5-05	0.280909	1.80774e-05	0.00108584	3.10141e-05	0.030378	0.000766089	2920	0.280848	-2.3479	1.00472	3.25949	3.39248	-0.967294
D0002-5-06	0.280859	8.92759e-06	0.00123924	2.73938e-05	0.0394781	0.000983887	2879	0.28079	-5.35689	0.803425	3.3405	3.51865	-0.962673
D0002-5-07	0.28088	1.15631e-05	0.0011509	1.16991e-05	0.0326585	0.000294969	2906	0.280816	-3.80615	0.836296	3.30354	3.45831	-0.965334
D0002-5-08	0.280869	1.67402e-05	0.000540267	6.96416e-06	0.01597	0.000182693	2868	0.280839	-3.85997	0.936958	3.26668	3.43093	-0.983727
Note: a Initial Hf isotope ratios are calculated nearly by their Age of single grain zircon; b TDM2 are calculated by assuming a mean 176Lu/177Hf value of 0.015 for the average
continental crust (Griffin et al., 2002).
